# Supplementary material
Source: Springer Nature journal article supplement (https://www.springermedizin.de/resource/supplementary/12911_2009_313_MOESM5_ESM.PDF/9525458)
Supplement: MOESM5 [file 9525458]

## ***Prostate Cancer Screening: Fostering Informed Decisions***

We thank you for your participation today. We would appreciate it if you took a moment to answer this questionnaire for us. There are two parts to this questionnaire. The first part asks for your feedback about the educational website, and the second part asks questions about you and your health. Please take your time in answering all of the questions. Your responses will be kept confidential.

### **Part I: Questions about the website**

1. How would you rate the amount of information in the website?  
☐ much less information than was needed  
☐ a little less information than was needed  
☐ about the right amount of information  
☐ a little more information than was needed  
☐ a lot more information than was needed
2. How would you rate the length of the website?  
☐ much too long  
☐ a little too long  
☐ just about right  
☐ should have been a little longer  
☐ should have been much longer
3. How clear was the information in the website?  
☐ everything was clear  
☐ most things were clear  
☐ some things were clear  
☐ many things were unclear
4. What did you think that the overall message of the **website** was suggesting?  
☐ that men should definitely not get screened  
☐ that men should probably not get screened  
☐ it did not suggest one decision or the other  
☐ that men should probably get screened  
☐ that men should definitely get screened
5. Did the website make you think of new questions to ask your doctor? ☐yes ☐no
6. Did the website help you explore the benefits and limitations of screening?  
☐ helped very much to explore the benefits and limitations  
☐ helped somewhat to explore the benefits and limitations  
☐ helped a little to understand the benefits and limitations  
☐ was not helpful

7. Did the information that was presented in the website address your questions about prostate cancer and prostate cancer screening?

- ☐ Yes, it completely addressed my questions
- ☐ Yes, it addressed most of my questions
- ☐ It addressed some of my questions
- ☐ No, it did not adequately address my questions.

8. Did the website make you feel nervous or fearful about prostate cancer screening?

- ☐ Yes, it made me nervous
- ☐ Yes, it made me somewhat nervous
- ☐ It made me a little nervous
- ☐ No, it did not make me nervous

9. What else would you have liked to see in this website?

10. What would you like to see removed from the website?

## **Part II: Questions about You and Your Health**

1. What is your age? \_\_\_\_\_

2. What is your marital status?

- ☐ never married
- ☐ married
- ☐ living in a marriage-like relationship
- ☐ separated
- ☐ divorced
- ☐ widowed
- ☐ other: \_\_\_\_\_

3. How many years of school have you completed?

- ☐ 8<sup>th</sup> grade or less
- ☐ some high school
- ☐ high school graduate or GED
- ☐ some college
- ☐ college graduate
- ☐ graduate work/degree

4. Are you currently employed?

☐ not employed

☐ retired

☐ full-time employed

☐ part-time employed

5. To which ethnic group do you belong?

☐ White

☐ Black or African-American

☐ Hispanic or Latino

☐ Caribbean or West Indian

☐ Asian

☐ Native Hawaiian or Other Pacific Islander

☐ Other: \_\_\_\_\_

6. Do you have health insurance? ☐ yes ☐ no

7. How many times have you been screened for prostate cancer?

☐ number of PSA blood tests

☐ number of DRE tests

8. How often do you get screened for prostate cancer?

☐ every 3-6 months

☐ annually

☐ every 2 years

☐ don't know

9. What was the approximate date of your most recent examination for prostate cancer?

\_\_\_\_\_/\_\_\_\_\_/\_\_\_\_\_

10. Have you ever had an abnormal screening result from a prostate cancer examination?

☐ yes ☐ no

11. Have you ever been diagnosed with prostate cancer?

☐ yes ☐ no

12. Please think about how good or bad your health is, on a 100 point scale. Zero is the equivalent of the worst health you can imagine, and 100 is equivalent to the best health you can imagine. Where would you put yourself on this scale, in terms of your own current health?

-----  
0 50 100

Your rating: \_\_\_\_\_
